# Supplementary material for: Phosphate anion-selective recognition by boron complex having plural hydrogen bonding sites
Source: Royal Society of Chemistry journal article supplement (doi:10.1039/b414901g), 2004-12-21
Supplement: b414901g.pdf [file b414901g.pdf]

*Electronic Supplemental Information*

Title: Phosphate anion-selective recognition by boron complex having plural hydrogen bonding sites

Author: Naohiro Kameta and Kazuhisa Hiratani\*

Content

Synthesis (scheme) and  $^1\text{H}$  NMR, IR, ESI-MS data for polyether **1**.

$^1\text{H}$  NMR, IR, ESI-MS data for ligand **2** and boron complex.

$^1\text{H}$  NMR titration plot on the complexation between the boron complex and  $\text{H}_2\text{PO}_4^-$  in  $\text{CD}_3\text{CN}$  (Figure).

Derivation of equation for determination of binding constants.

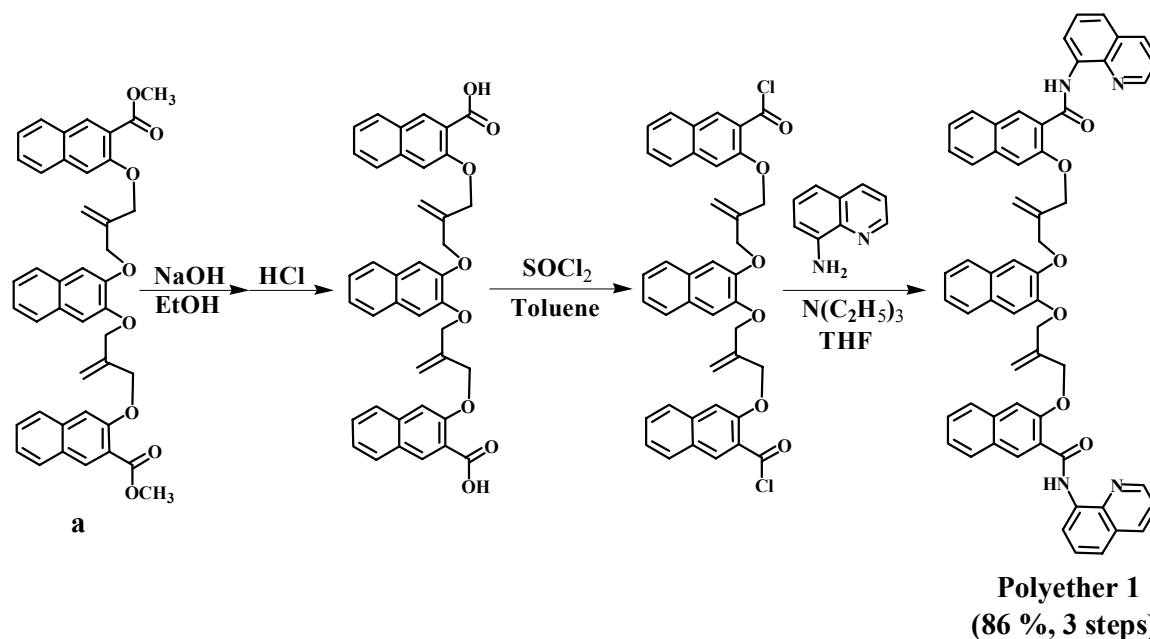

Scheme: Synthesis of polyether **1**. Synthetic method of compound **a** was described in Ref.6

**Polyether 1**:  $^1\text{H NMR}$  ( $\text{CDCl}_3$ )  $\delta$  4.86 (s, 4H, Ar- $\text{CH}_2$ ), 5.13 (s, 4H, Ar- $\text{CH}_2$ ), 5.53 (s, 2H,  $\text{CH}_2=\text{C}$ ), 5.58 (s, 2H,  $\text{CH}_2=\text{C}$ ), 6.85 (s, 2H, Ar), 7.19 (dd, 2H, Ar), 7.21 (t, 2H, Ar), 7.29 (s, 2H, Ar), 7.28 (dd, 2H, Ar), 7.35 (t, 2H, Ar), 7.41 (t, 2H, Ar), 7.43 (dd, 2H, Ar), 7.54 (t, 2H, Ar), 7.58 (d, 2H, Ar), 7.89 (d, 2H, Ar), 7.98 (dd, 2H, Ar), 8.67 (dd, 2H, Ar), 8.82 (s, 2H, Ar), 9.04 (dd, 2H, Ar), 12.1 (s, 2H, NH). IR (KBr)  $1662\text{ cm}^{-1}$ ,  $1530$  (CONH). ESI-MS ( $\text{CH}_3\text{CN}$ )  $m/z = 893$  ( $\text{H}^+$ ).

**Ligand 2**:  $^1\text{H NMR}$  ( $\text{CDCl}_3$ )  $\delta$  4.02 (s, 8H, Ar- $\text{CH}_2$ ), 4.60 (s, 2H,  $\text{CH}_2=\text{C}$ ), 4.66 (s, 2H,  $\text{CH}_2=\text{C}$ ), 7.28 (dd, 2H, Ar), 7.35 (t, 2H, Ar), 7.46 (t, 2H, Ar), 7.53 (dd, 2H, Ar), 7.62 (d, 2H, Ar), 7.63 (d, 2H, Ar), 7.77 (d, 2H, Ar), 7.84 (dd, 2H, Ar), 7.95 (d, 2H, Ar), 8.23 (dd, 2H, Ar), 8.35 (s, 2H, Ar), 8.89 (dd, 2H, Ar), 8.94 (dd, 2H, Ar), 6.26 (s, 2H, OH), 11.2 (s, 2H, OH), 12.2 (s, 2H, NH). IR (KBr)  $3447\text{ cm}^{-1}$  (O-H, broad),  $1654$ ,  $1537$  (CONH). ESI-MS ( $\text{CH}_3\text{CN}$ )  $m/z = 893$  ( $\text{H}^+$ ).

**Boron complex**:  $^1\text{H NMR}$  ( $\text{CDCl}_3$ )  $\delta$  3.94 (s, 8H, Ar- $\text{CH}_2$ ), 3.97 (s, 8H, Ar- $\text{CH}_2$ ), 4.43 (s, 4H,  $\text{CH}_2=\text{C}$ ), 4.61 (s, 4H,  $\text{CH}_2=\text{C}$ ), 7.18 (dd, 4H, Ar), 7.23 (t, 4H, Ar), 7.33 (t, 4H, Ar), 7.45 (dd, 4H, Ar), 7.49 (d, 4H, Ar), 7.51 (d, 4H, Ar), 7.75 (d, 4H, Ar), 7.74 (dd, 4H, Ar), 7.82 (d, 4H, Ar), 8.13 (dd, 4H, Ar), 8.22 (s, 4H, Ar), 8.78 (dd, 4H, Ar), 8.84 (dd, 4H, Ar), 11.1 (s, 4H, OH), 11.9 (s, 4H, NH), 0.96 (t, 9H,  $\text{NEt}_3$ ), 2.78 (q, 6H,  $\text{NEt}_3$ ). IR (KBr)  $3444\text{ cm}^{-1}$  (O-H, broad),  $1653$ ,  $1534$  (CONH). Elemental analysis, found (calc.), C, 77.79 (77.72); H, 4.73 (4.69); N, 6.20 (6.25).

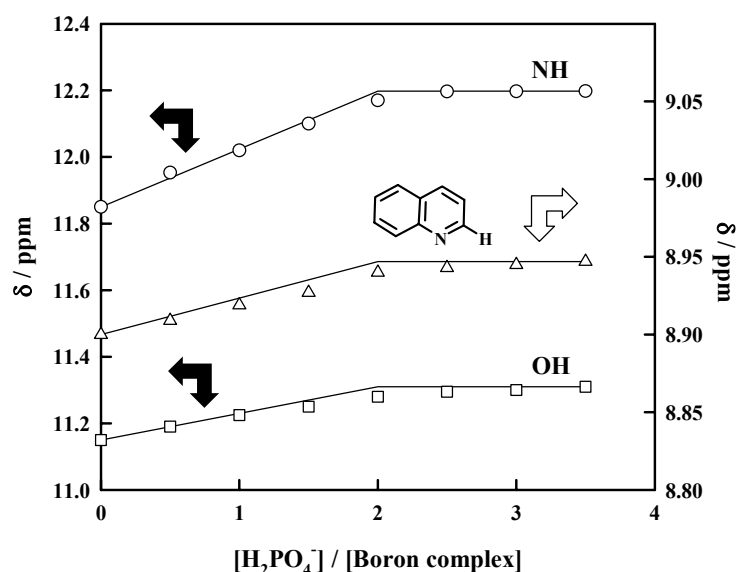

Figure: <sup>1</sup>H-NMR titration plots of the hydroxy (OH), the amide (NH), and the quinoline (2-position) in the boron complex on the complexation with H<sub>2</sub>PO<sub>4</sub><sup>-</sup> in CD<sub>3</sub>CN. □ δ / ppm values indicate the apparent chemical shifts of those protons.

Derivation of equation for determination of binding constants ( $K_1$  and  $K_2$ ).

$$K_1 = [\text{Boron-Anion}] / ([\text{Boron}][\text{Anion}])$$

$$K_2 = [\text{Boron-2 Anion}] / [\text{Boron-Anion}][\text{Anion}]$$

$$[\text{Anion}]_{\text{total}} = [\text{Anion}] + [\text{Boron-Anion}] + [\text{Boron-2 Anion}]$$

$$K_1 K_2 [\text{Anion}]^3 + (2K_1 K_2 [\text{Boron}]_{\text{total}} - K_1 K_2 [\text{Anion}]_{\text{total}} + K_1) [\text{Anion}]^2 + (K_1 [\text{Boron}]_{\text{total}} - K_1 [\text{Anion}]_{\text{total}} + 1) [\text{Anion}] - [\text{Anion}]_{\text{total}} = 0$$

$$\Delta\delta_{\text{obs}} = \frac{K_1 [\text{Anion}] (\delta_1 - \delta_{\text{Boron}}) + K_1 K_2 [\text{Anion}]^2 (\delta_2 - \delta_{\text{Boron}})}{1 + K_1 [\text{Anion}] + K_1 K_2 [\text{Anion}]^2}$$

$\delta_{\text{Boron}}$  is the chemical shifts of the amide NH proton in the boron complex.  $\delta_1$  and  $\delta_2$  are the chemical shifts of the amide NH proton in the boron complex captured with a anion and two anions respectively.

# Supplementary Material (ESI) for Chemical Communications  
# This journal is © The Royal Society of Chemistry 2005
